# Supplementary material for: Effects of Meditation on Structural Changes of the Brain in Patients With Mild Cognitive Impairment or Alzheimer’s Disease Dementia
Source: PubMed Central journal article supplement (PMC8633496; doi:10.3389/fnhum.2021.728993), 2021-11-12
Supplement: Data_Sheet_1.pdf [file Data_Sheet_1.pdf]

**Table 1.** Baseline results on comparing the cortical thickness of the meditation group with the non-meditation group. The ‘lh’ and ‘rh’ represent the left and right hemispheres respectively. bank ssts: banks of the superior temporal sulcus.

| <b>ROIs</b>                   | <b>P-value</b> | <b>ROIs</b>                   | <b>P-value</b> |
|-------------------------------|----------------|-------------------------------|----------------|
| lh_bank ssts                  | 0.949          | rh_bank ssts                  | 0.898          |
| lh_caudal anterior cingulate  | 0.699          | rh_caudal anterior cingulate  | 0.847          |
| lh_caudal middle frontal      | 0.562          | rh_caudal middle frontal      | 0.562          |
| lh_cuneus                     | 1              | rh_cuneus                     | 0.699          |
| lh_entorhinal                 | 0.478          | rh_entorhinal                 | 0.652          |
| lh_fusiform                   | 0.365          | rh_fusiform                   | 0.699          |
| lh_inferior parietal          | 0.699          | rh_inferior parietal          | 0.898          |
| lh_inferior temporal          | 0.797          | rh_inferior temporal          | 0.847          |
| lh_isthmus cingulate          | 0.193          | rh_isthmus cingulate          | 0.332          |
| lh_lateral occipital          | 0.27           | rh_lateral occipital          | 0.332          |
| lh_lateral orbitofrontal      | 0.243          | rh_lateral orbitofrontal      | 0.797          |
| lh_lingual                    | 0.401          | rh_lingual                    | 0.478          |
| lh_medial orbitofrontal       | 0.562          | rh_medial orbitofrontal       | 0.401          |
| lh_middle temporal            | 0.949          | rh_middle temporal            | 0.699          |
| lh parahippocampal            | 0.797          | rh parahippocampal            | 0.332          |
| lh_paracentral                | 1              | rh_paracentral                | 0.519          |
| lh_pars opercularis           | 0.847          | rh_pars opercularis           | 0.332          |
| lh_pars orbitalis             | 0.365          | rh_pars orbitalis             | 0.606          |
| lh_pars triangularis          | 0.949          | rh_pars triangularis          | 0.797          |
| lh_pericalcarine              | 1              | rh_pericalcarine              | 1              |
| lh_postcentral                | 0.606          | rh_postcentral                | 0.332          |
| lh_posterior cingulate        | 0.193          | rh_posterior cingulate        | 0.519          |
| lh_precentral                 | 0.898          | rh_precentral                 | 0.27           |
| lh_precuneus                  | 0.652          | rh_precuneus                  | 0.365          |
| lh_rostral anterior cingulate | 0.562          | rh_rostral anterior cingulate | 0.116          |

|                           |       |                           |       |
|---------------------------|-------|---------------------------|-------|
| lh_rostral middle frontal | 1     | rh_rostral middle frontal | 0.949 |
| lh_superior frontal       | 0.748 | rh_superior frontal       | 0.699 |
| lh_superior parietal      | 0.797 | rh_superior parietal      | 0.898 |
| lh_superior temporal      | 0.797 | rh_superiortemporal       | 0.898 |
| lh_supramarginal          | 0.797 | rh_supramarginal          | 0.847 |
| lh_frontal pole           | 0.748 | rh_frontal pole           | 0.652 |
| lh_temporal pole          | 0.847 | rh_temporal pole          | 0.797 |
| lh_transverse temporal    | 0.898 | rh_transverse temporal    | 0.606 |
| lh_insula                 | 0.365 | rh_insula                 | 0.478 |

**Table 2.** Baseline results on comparing the gray matter volume of the meditation group with the non-meditation group. The ‘lh’ and ‘rh’ represent the left and right hemispheres respectively. bank ssts: banks of the superior temporal sulcus.

| <b>ROIs</b>                  | <b>P-value</b> | <b>ROIs</b>                  | <b>P-value</b> |
|------------------------------|----------------|------------------------------|----------------|
| lh_bank ssts                 | 0.652          | rh_bank ssts                 | 0.652          |
| lh_caudal anterior cingulate | 0.898          | rh_caudal anterior cingulate | 0.562          |
| lh_caudal middle frontal     | 0.217          | rh_caudal middle frontal     | 0.797          |
| lh_cuneus                    | 0.847          | rh_cuneus                    | 0.748          |
| lh_entorhinal                | 0.133          | rh_entorhinal                | 0.898          |
| lh_fusiform                  | 0.606          | rh_fusiform                  | 0.652          |
| lh_inferior parietal         | 0.652          | rh_inferior parietal         | 0.699          |
| lh_inferior temporal         | 0.699          | rh_inferior temporal         | 0.606          |
| lh_isthmus cingulate         | 0.217          | rh_isthmus cingulate         | 0.065          |
| <b>lh_lateral occipital</b>  | <b>0.034</b>   | rh_lateral occipital         | 0.27           |
| lh_lateral orbitofrontal     | 0.699          | rh_lateral orbitofrontal     | 0.519          |
| lh_lingual                   | 1              | rh_lingual                   | 0.478          |
| lh_medial orbitofrontal      | 0.847          | rh_medial orbitofrontal      | 0.365          |
| lh_middle temporal           | 0.748          | rh_middle temporal           | 0.478          |
| lh_parahippocampal           | 0.519          | rh_parahippocampal           | 0.606          |
| lh_paracentral               | 0.243          | rh_paracentral               | 0.076          |

|                               |       |                               |              |
|-------------------------------|-------|-------------------------------|--------------|
| lh_pars opercularis           | 1     | rh_pars opercularis           | 0.438        |
| lh_pars orbitalis             | 1     | rh_pars orbitalis             | 0.949        |
| lh_pars triangularis          | 0.898 | <b>rh_pars triangularis</b>   | <b>0.04</b>  |
| lh_pericalcarine              | 0.365 | rh_pericalcarine              | 0.438        |
| lh_postcentral                | 0.562 | <b>rh_postcentral</b>         | <b>0.028</b> |
| lh_posterior cingulate        | 0.27  | rh_posterior cingulate        | 0.438        |
| lh_precentral                 | 0.898 | rh_precentral                 | 0.652        |
| lh_precuneus                  | 0.652 | rh_precuneus                  | 1            |
| lh_rostral anterior cingulate | 0.562 | rh_rostral anterior cingulate | 0.438        |
| lh_rostral middle frontal     | 0.401 | rh_rostral middle frontal     | 0.27         |
| lh_superior frontal           | 1     | rh_superior frontal           | 0.606        |
| lh_superior parietal          | 0.133 | rh_superior parietal          | 0.652        |
| lh_superior temporal          | 0.898 | rh_superior temporal          | 0.949        |
| lh_supramarginal              | 0.847 | rh_supramarginal              | 1            |
| lh_frontal pole               | 0.797 | rh_frontal pole               | 0.116        |
| lh_temporal pole              | 1     | rh_temporal pole              | 0.847        |
| lh_transverse temporal        | 0.243 | rh_transverse temporal        | 0.898        |
| lh_insula                     | 0.171 | rh_insula                     | 0.217        |
